# Supplementary material for: Head-to-head study of diagnostic accuracy of plasma and cerebrospinal fluid p-tau217 versus p-tau181 and p-tau231 in a memory clinic cohort
Source: Springer Nature journal article supplement (doi:10.1007/s00415-023-12148-5), 2024-01-09
Supplement: MOESM1 [file 26609726]

## **Head-to-head study of diagnostic accuracy of plasma and cerebrospinal fluid p-tau217 versus p-tau181 and p-tau231 in a memory clinic cohort**

Augusto J. Mendes, PhD; Federica Ribaldi, PhD, Aurelien Lathuiliere, MD, PhD; Nicholas J. Ashton, PhD; Shorena Janelidze, PhD; Henrik Zetterberg, MD, PhD; Max Scheffler, MD; Frédéric Assal, MD; Valentina Garibotto, MD; Kaj Blennow, MD; Oskar Hansson, MD, PhD; Giovanni B. Frisoni, MD

### **CONTENT**

**Figure S1.** Boxplots for each plasma p-tau variant in CI and CU according to their cardiovascular, hypercholesterolemia, hypertension, and diabetes history (A-D) and scatter plot between each p-tau concentration and creatinine levels (E).

**Table S1.** Number of days between the collection of plasma or CSF and traditional biomarkers plus MMSE (Median  $\pm$  Interquartile Range [IQR]).

**Figure S2.** Classification accuracy of the three isoforms of p-tau measured in plasma and CSF in amyloid and tau positivity evaluated in CSF.

**Table S2.** The optimal cut-off using Youden's J for each p-tau variant and underlying sensitivity, specificity, FPR, FNR, and accuracy according to amyloid and tau positivity derived from PET.

**Figure S3.** Violin plots for the three p-tau variants evaluated in CSF with the 95% sensitivity, 95% specificity, and optimal cut-off over the amyloid and tau status assessed in PET.

## Supplementary Materials

### (A) Cardiovascular

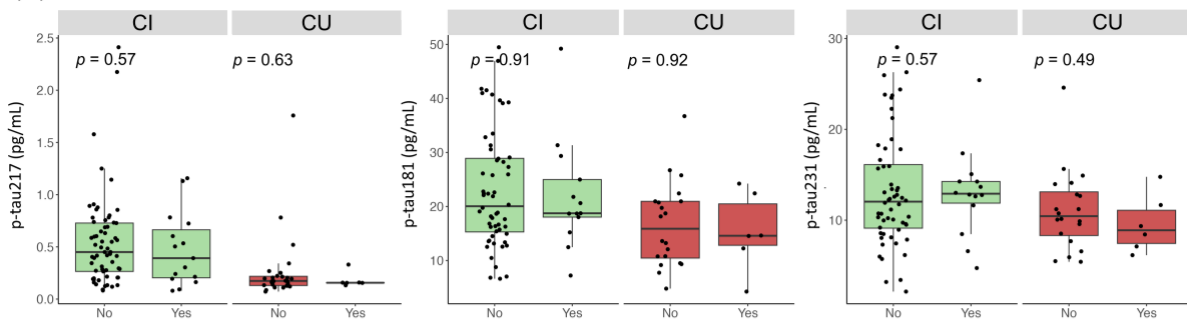

### (B) Hypercholesterolemia

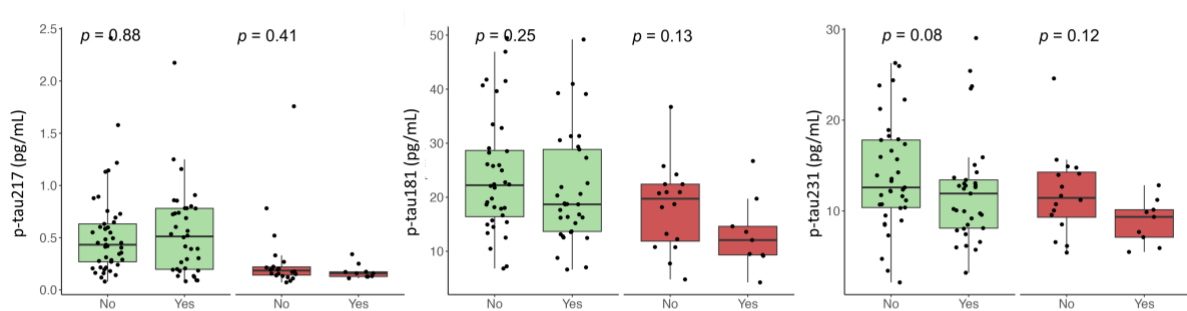

### (C) Hypertension

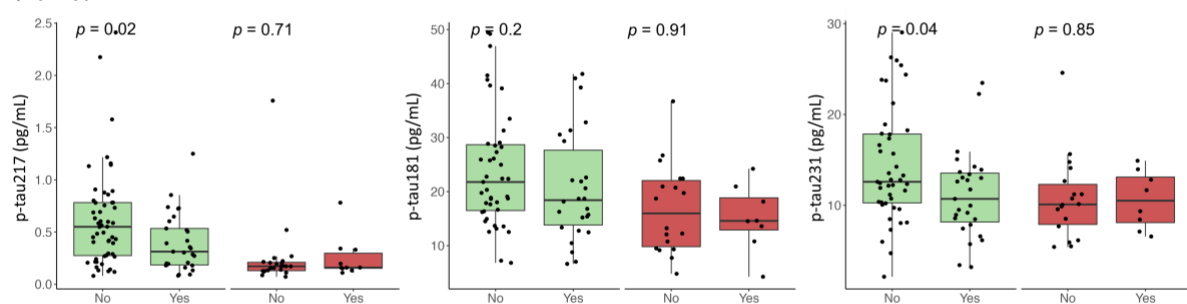

### (D) Diabetes

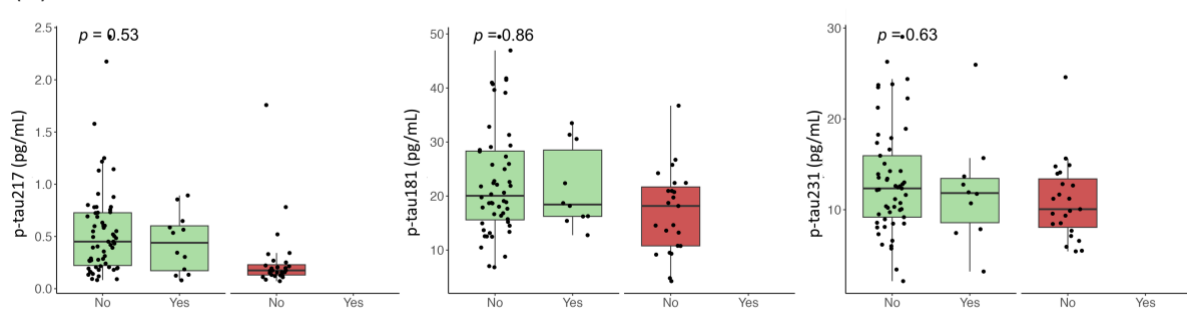

### (E) Creatinine

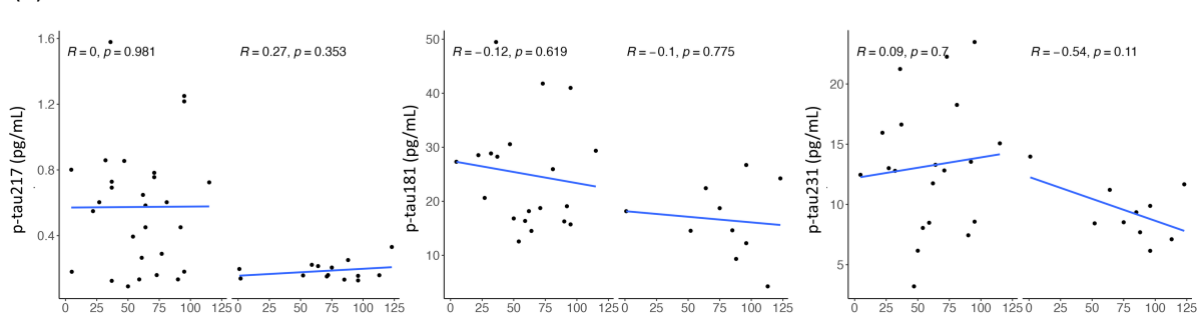

**Figure S1.** Boxplots for each plasma p-tau variant in CI and CU according to their cardiovascular, hypercholesterolemia, hypertension, and diabetes history (A-D) and scatter plot between each p-tau concentration and creatinine levels (E).

**Table S1.** Number of days between the collection of plasma or CSF and traditional biomarkers plus MMSE (Median  $\pm$  Interquartile Range [IQR]).

|             | Plasma       | CSF           |
|-------------|--------------|---------------|
| Amyloid-PET | 95 $\pm$ 199 | 32 $\pm$ 56   |
| Tau-PET     | 97 $\pm$ 153 | 101 $\pm$ 207 |
| MRI         | 26 $\pm$ 91  | 33 $\pm$ 67   |
| MMSE        | 73 $\pm$ 118 | 50 $\pm$ 63   |
| Plasma      | -            | 26 $\pm$ 91   |
| CSF         | 26 $\pm$ 91  | -             |

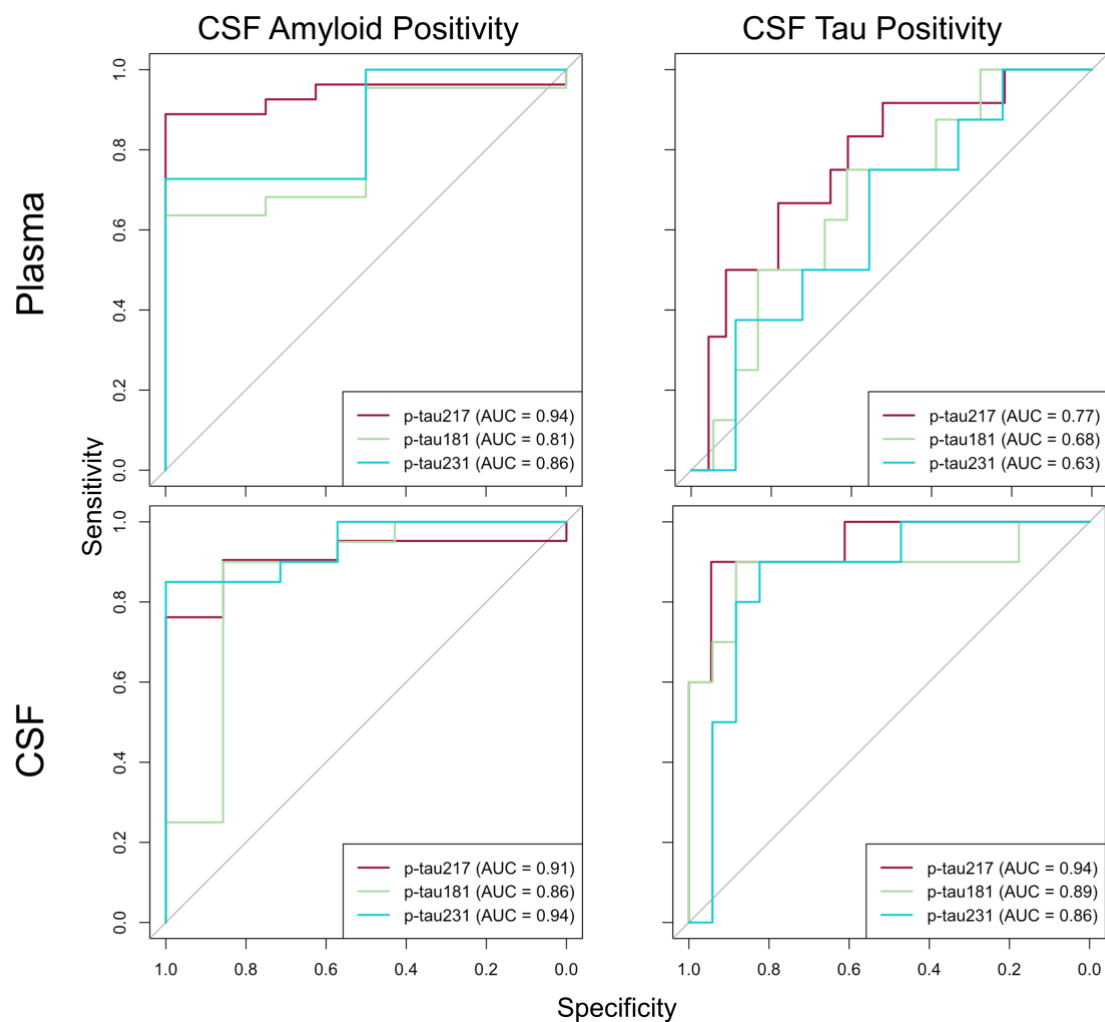

**Figure S2.** Classification accuracy of the three isoforms of p-tau measured in plasma and CSF in amyloid and tau positivity evaluated in CSF.

Supplementary Materials

**Table S2.** The optimal cut-off using Youden's J for each p-tau variant and underlying sensitivity, specificity, FPR, FNR, and accuracy according to amyloid and tau positivity derived from PET.

| Plasma (pg/mL) | Amyloid-PET Positivity |             |             |      |      |          | Tau-PET Positivity |             |             |      |      |          |
|----------------|------------------------|-------------|-------------|------|------|----------|--------------------|-------------|-------------|------|------|----------|
|                | Cut-off                | Sensitivity | Specificity | FPR  | FNR  | Accuracy | Cut-off            | Sensitivity | Specificity | FPR  | FNR  | Accuracy |
| p-tau217       | 0.27                   | 92.9        | 93.3        | 6.7  | 7.1  | 93.1     | 0.39               | 95.2        | 86.1        | 23.9 | 4.7  | 89.5     |
| p-tau181       | 18.73                  | 68          | 79.4        | 20.6 | 32   | 72.6     | 16.5               | 86.5        | 53.4        | 46.6 | 13.5 | 66.3     |
| p-tau231       | 11.65                  | 74.5        | 82.4        | 17.6 | 25.5 | 77.6     | 11.7               | 78.4        | 67.8        | 32.2 | 21.6 | 71.9     |
| CSF (pg/mL)    |                        |             |             |      |      |          |                    |             |             |      |      |          |
| p-tau217       | 18.12                  | 76.2        | 100         | 0    | 23.8 | 85.3     | 18.9               | 100         | 87.5        | 12.5 | 0    | 91.7     |
| p-tau181       | 396.5                  | 85.7        | 83.3        | 16.7 | 14.3 | 84.8     | 520.5              | 91.7        | 86.9        | 13.1 | 8.3  | 88.6     |
| p-tau231       | 753.3                  | 76.2        | 100         | 0    | 23.8 | 84.8     | 868.2              | 83.3        | 82.6        | 17.4 | 16.7 | 82.9     |

## Supplementary Materials

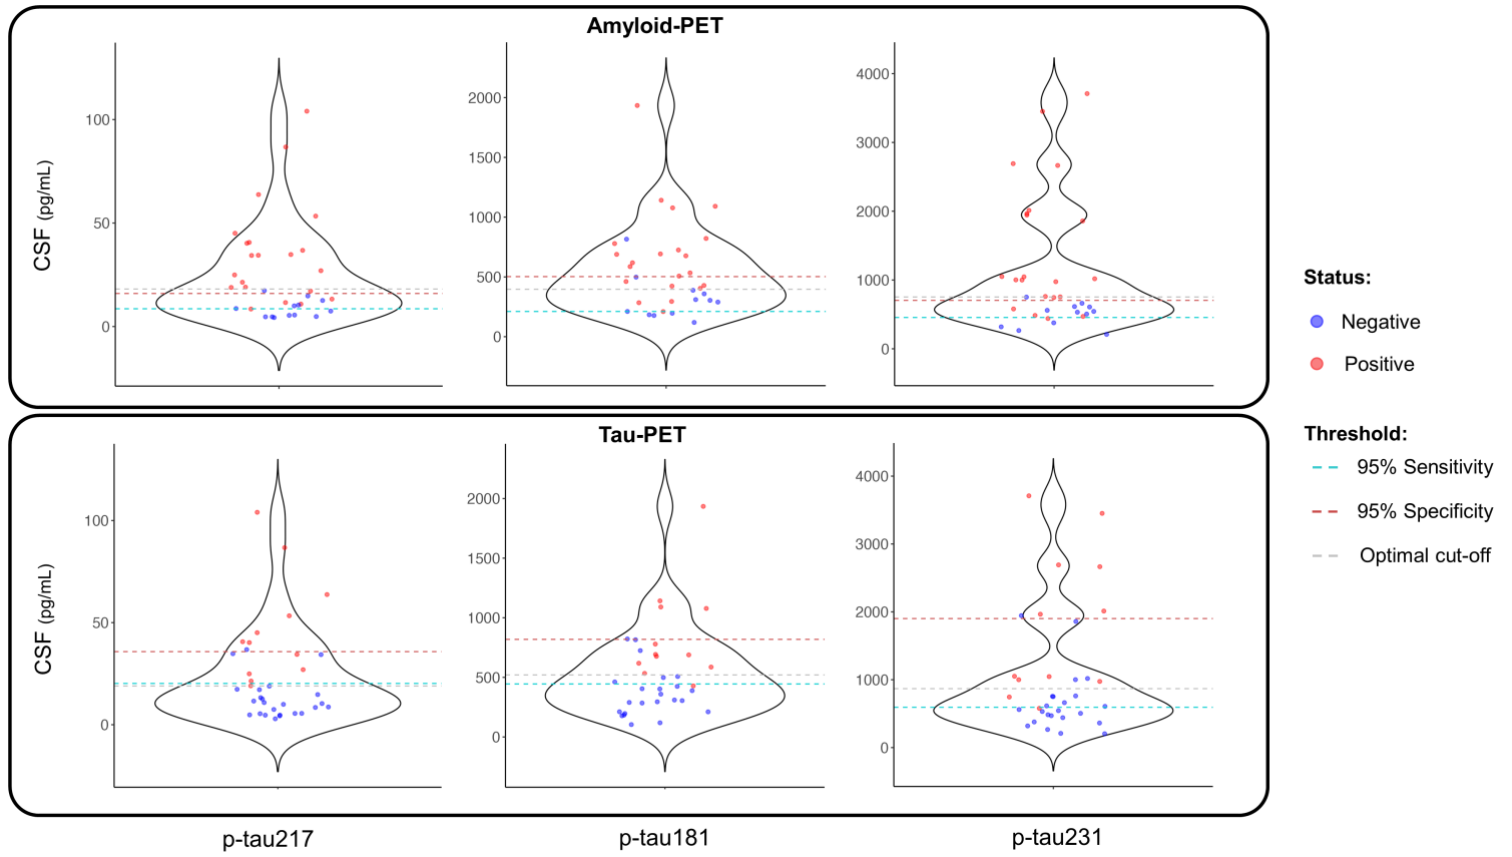

**Figure S3.** Violin plots for the three p-tau variants evaluated in CSF with the 95% sensitivity, 95% specificity, and optimal cut-off over the amyloid and tau status assessed in PET.
